# Supplementary material
Source: PubMed Central journal article supplement (PMC8349873)

Mizoguchi et al Circulation Research - Supplemental Material

Full unedited blot for Figure 1A

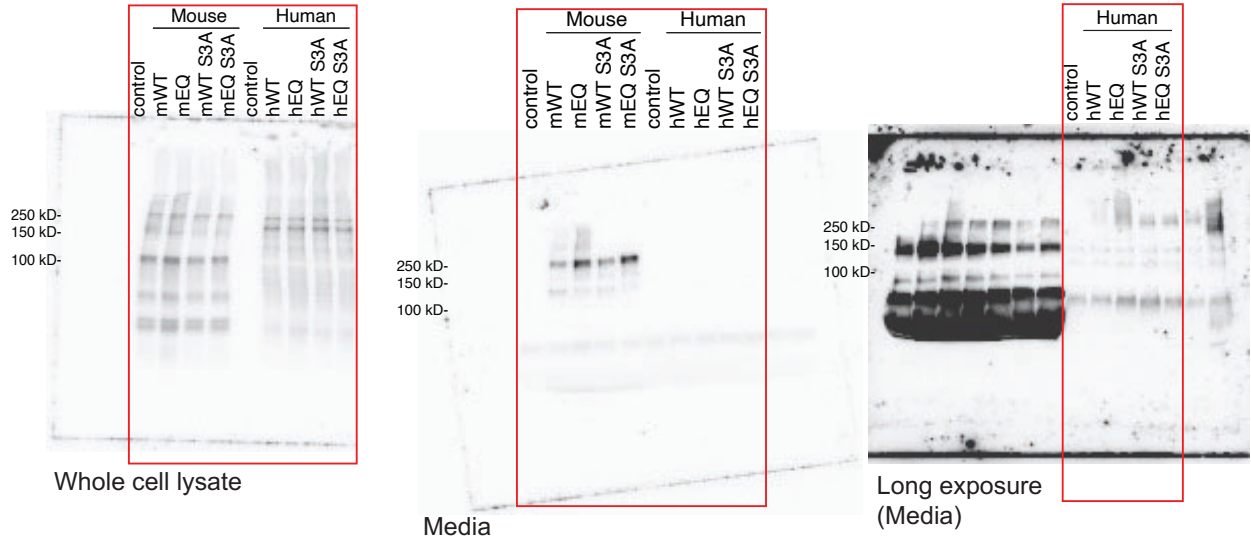

Full unedited blot for Figure 1D

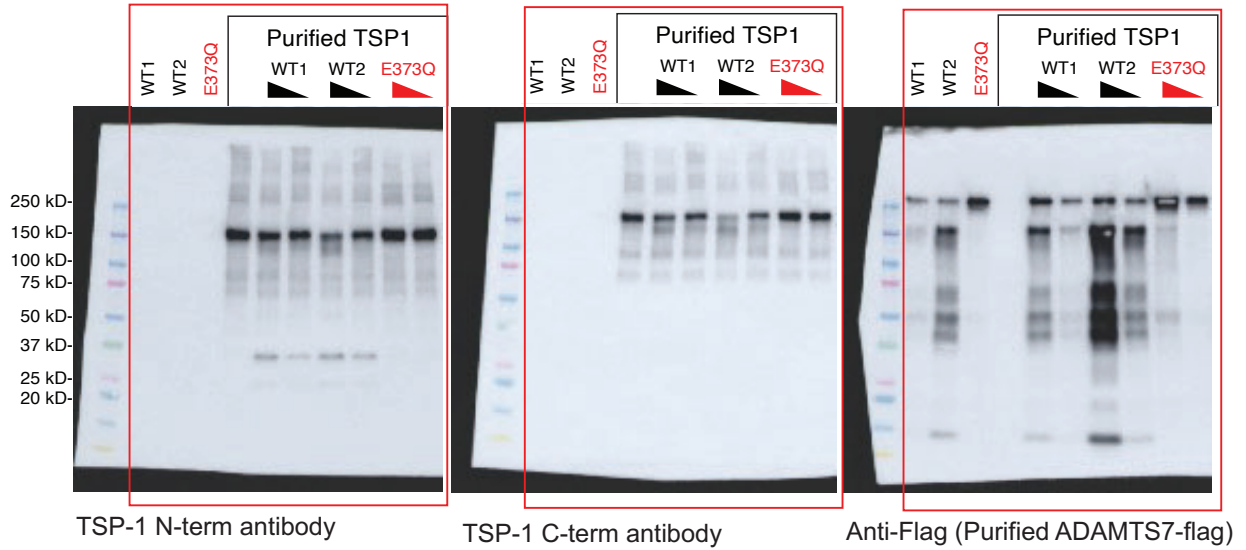

Full unedited blot for Figure 6E

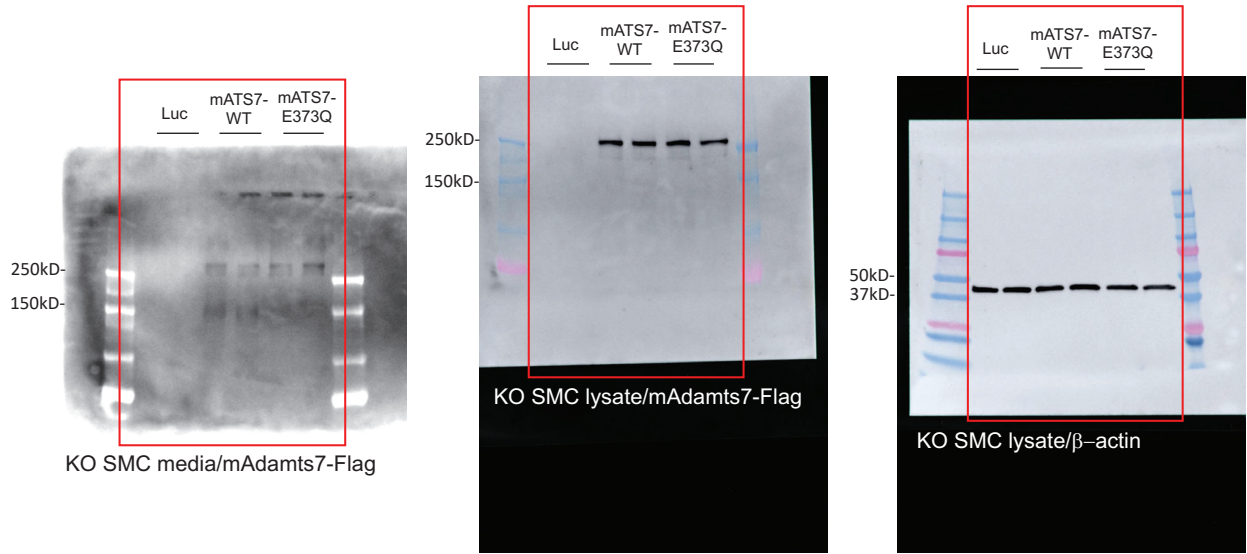

Full unedited blot for Figure 7A

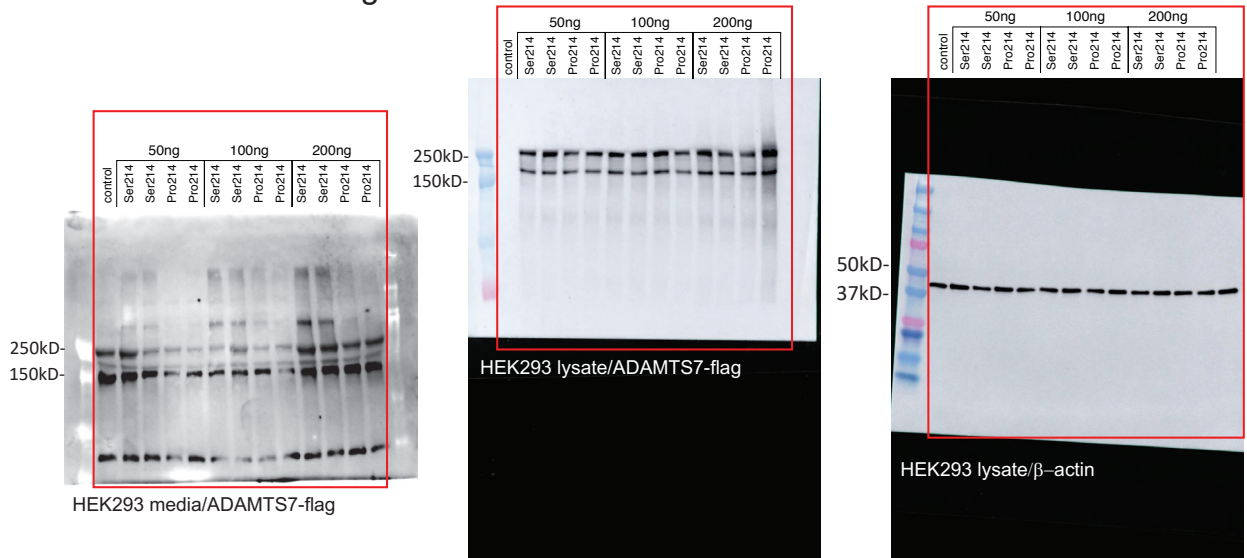

Full unedited blot for Figure 7D (HCA-SMC media)

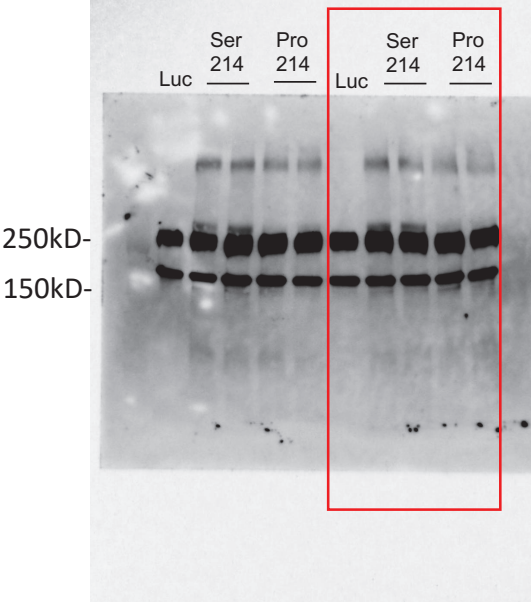

Full unedited blot for Figure 7D (HCA-SMC lysate)

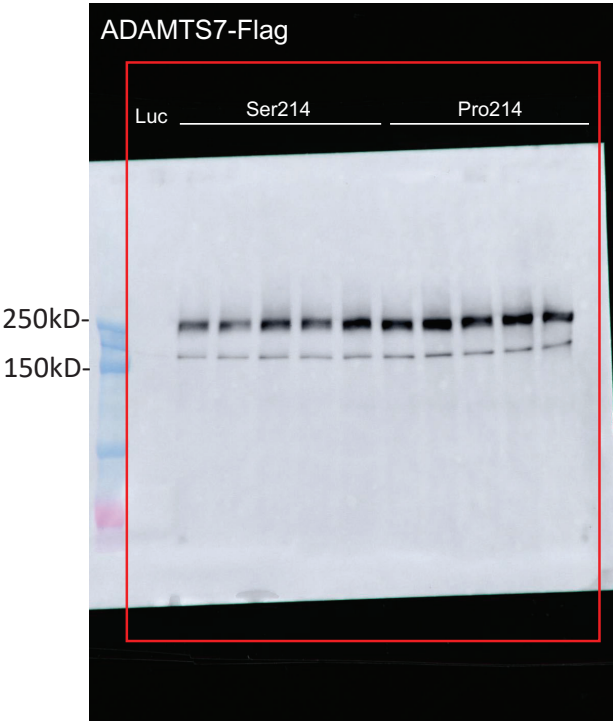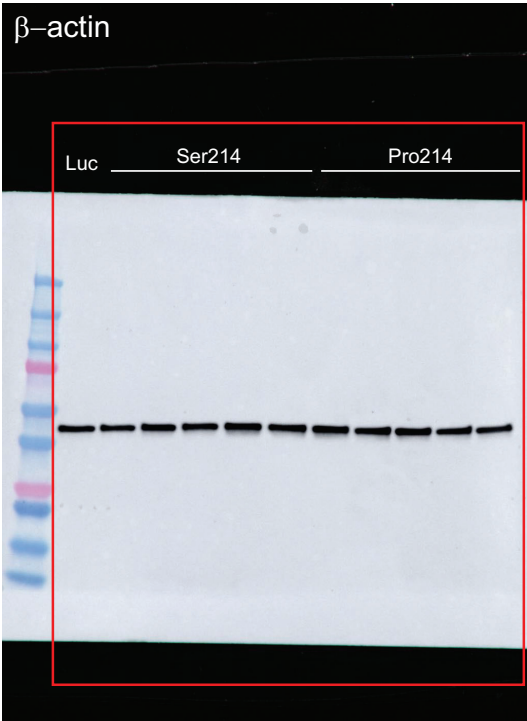

### Full unedited blot for Supplemental Figure 1A

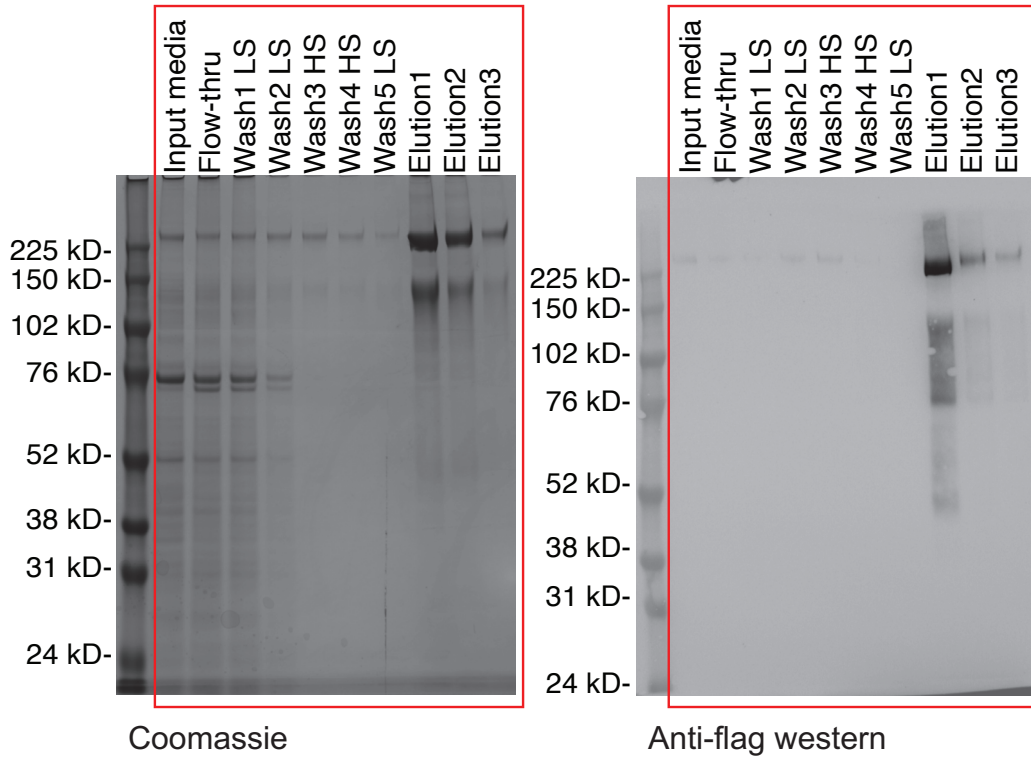

### Full unedited blot for Supplemental Figure 1B

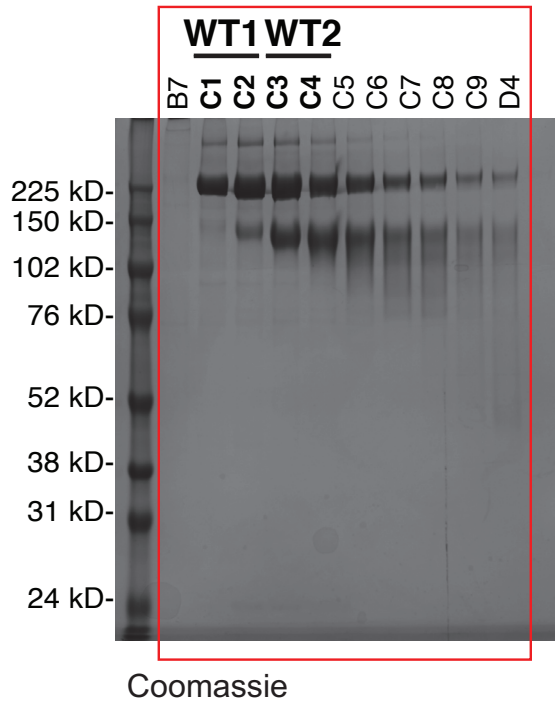

### Full unedited blot for Supplemental Figure 1C

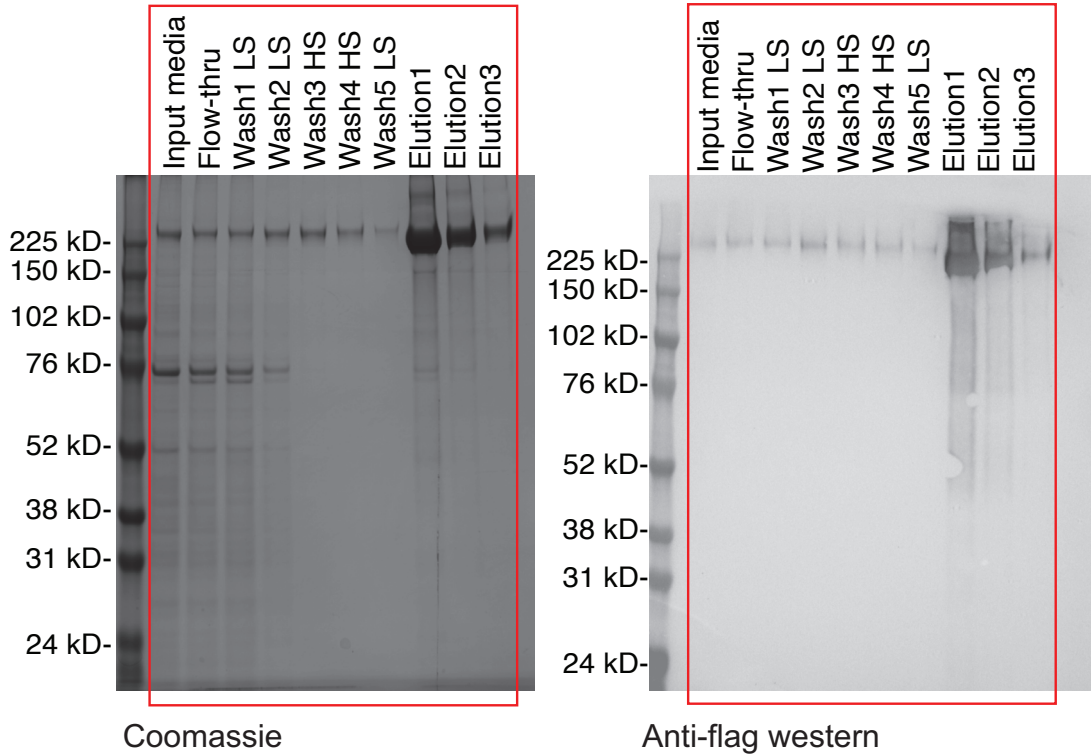

### Full unedited blot for Supplemental Figure 1D

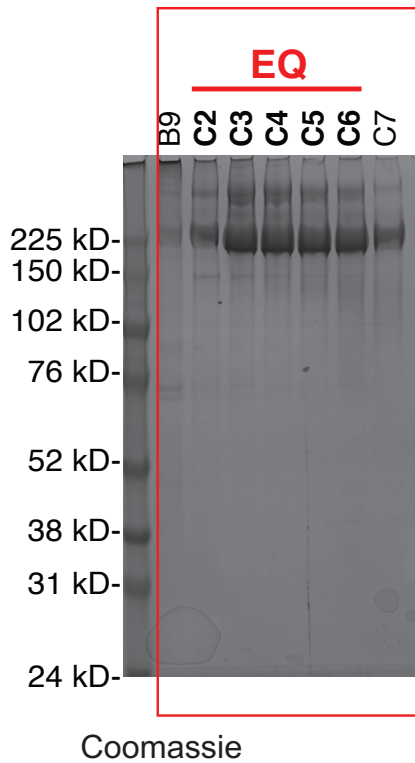

Full unedited blot for Supplementary Figure 3B (Male liver sample)

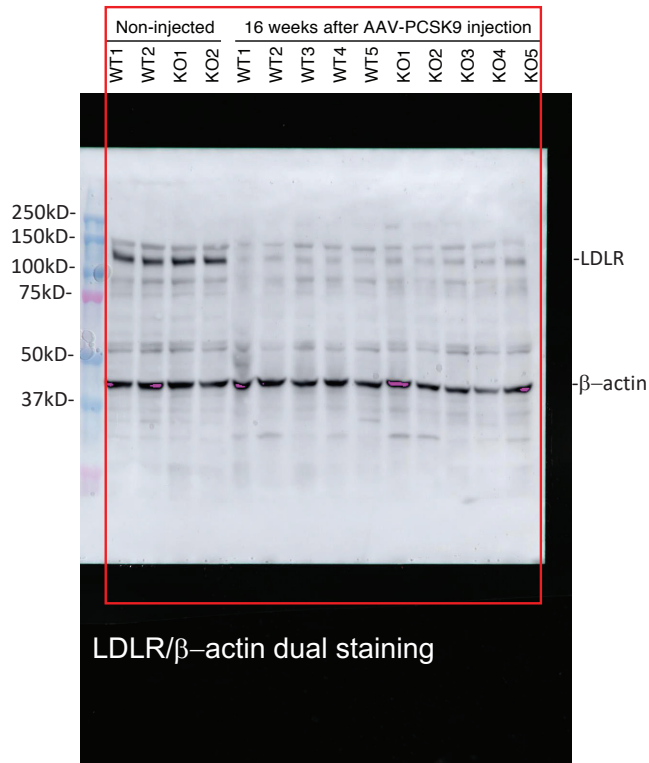

Full unedited immunoblot for Supplementary Figure 3B (Female liver samples)

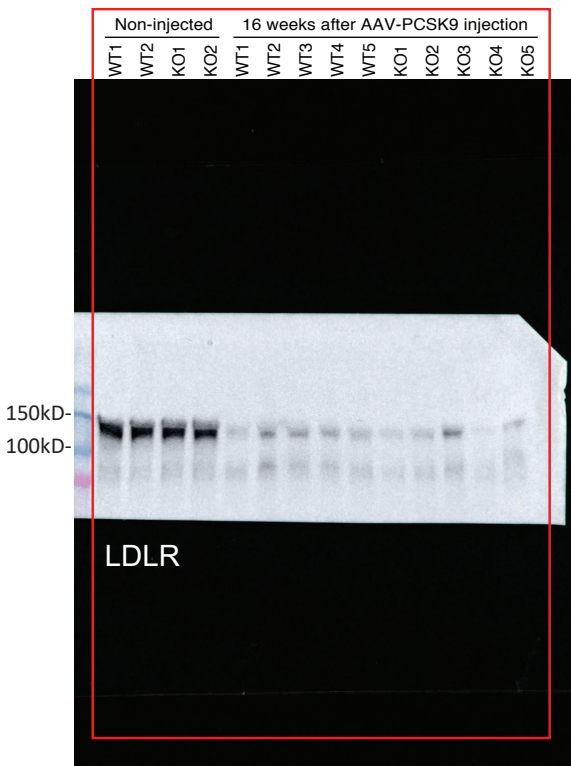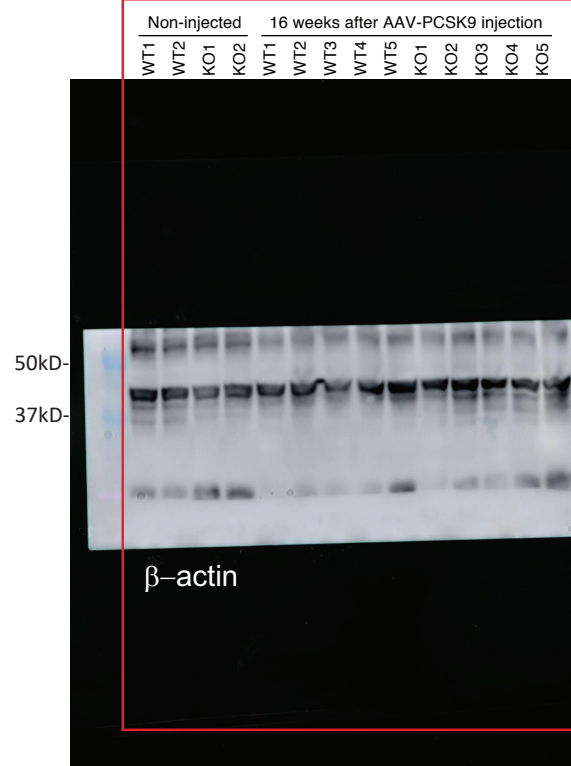



Full unedited blot for Supplementary Figure 3E (Male liver samples)

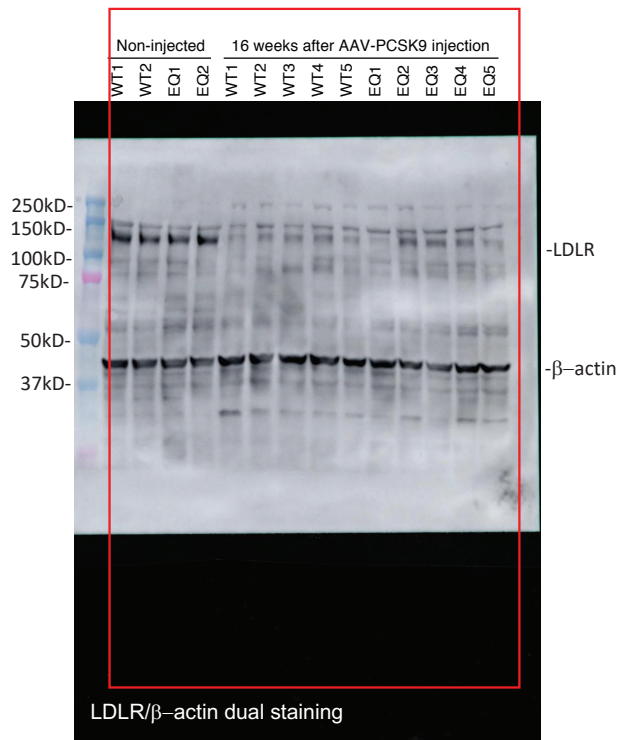

Full unedited blot for Supplementary Figure 3E (Female liver samples)

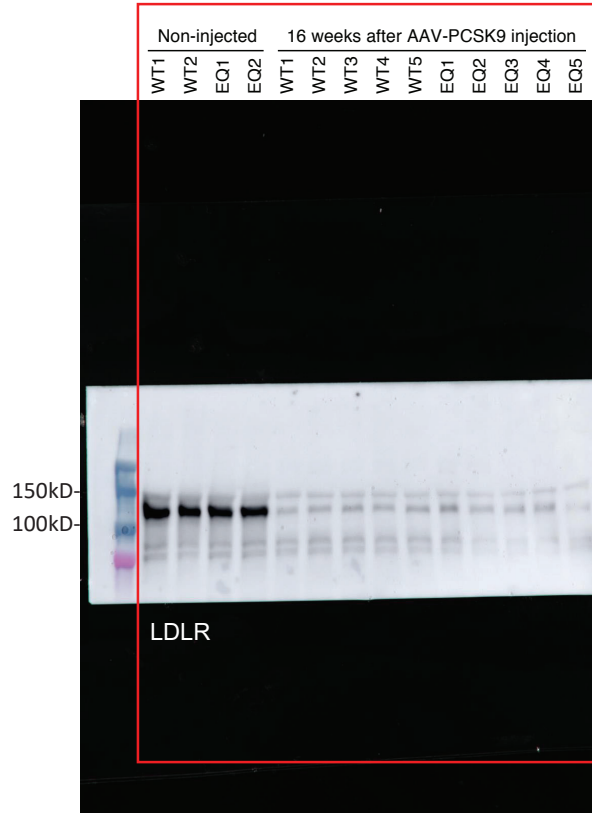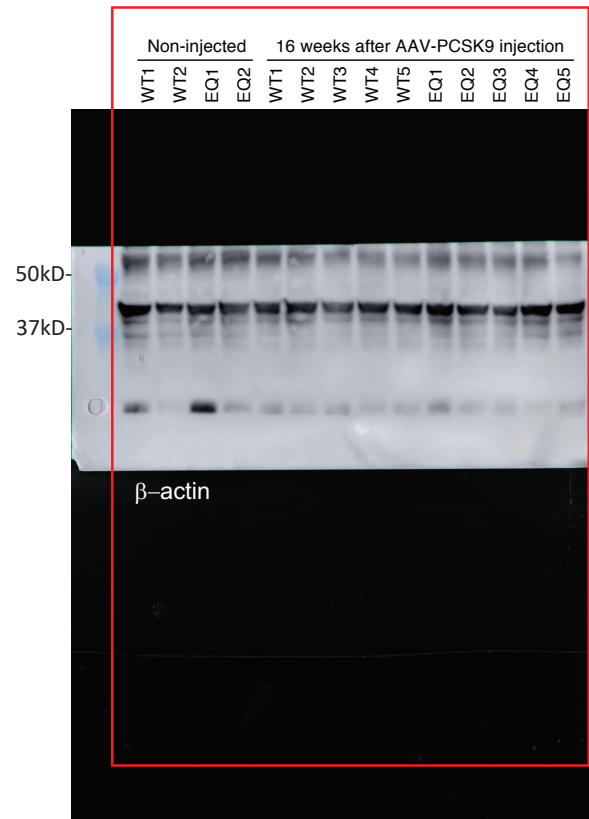

Full unedited blot for Supplementary Figure 5D

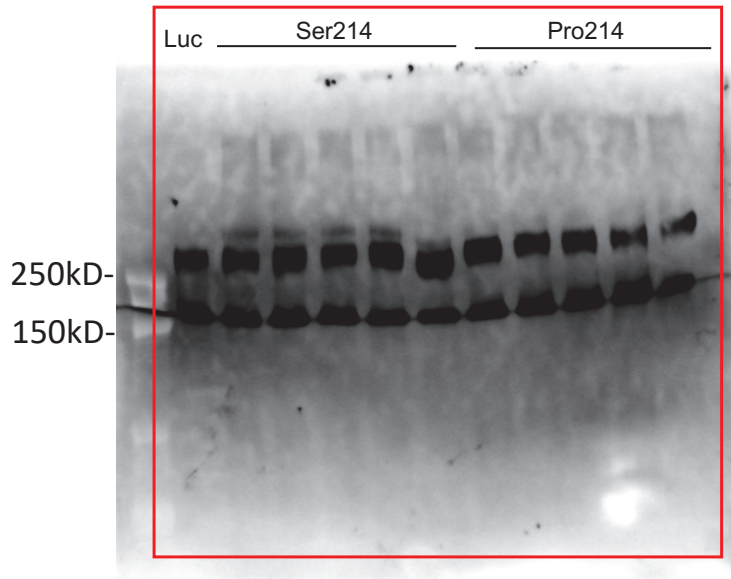

Full unedited blot for Supplementary Figure 5E

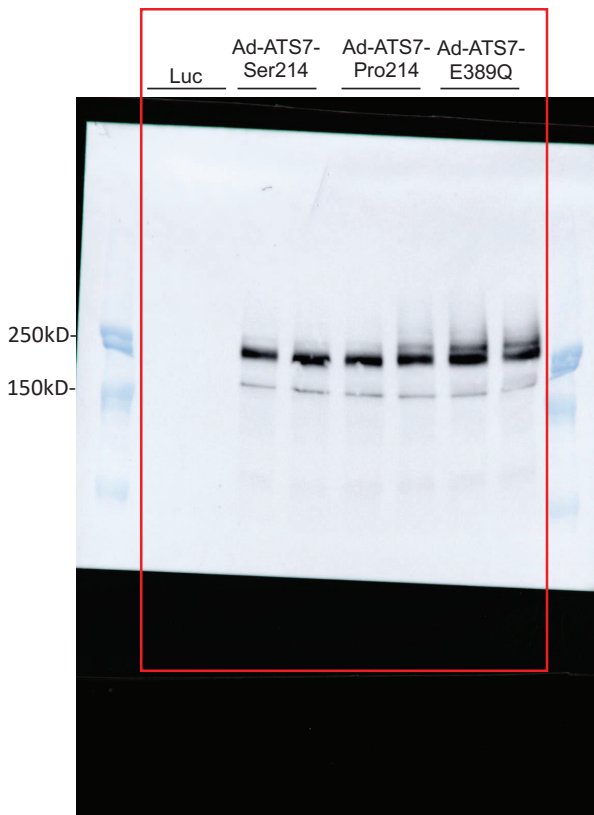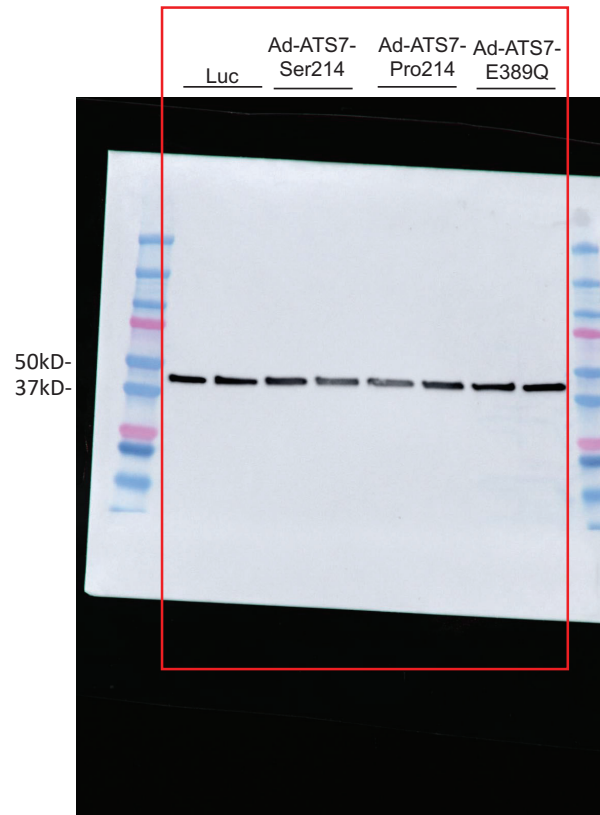

Supplement: NIHMS1720258-supplement-319163_Uncut_Gel_Blots.pdf [file NIHMS1720258-supplement-319163_Uncut_Gel_Blots.pdf]
